# Supplementary material for: Quantitative determination of prothioconazole in wheat grain, soybean, and pond water based on a polyclonal antibody
Source: Royal Society of Chemistry journal article supplement (doi:10.1039/d4ay00441h), 2024-01-01
Supplement: d4ay00441h1.pdf [file d4ay00441h1.pdf]

1 Supplementary Materials

2

3

4 **Tab. S1** Results of serum competition between two rabbits

| number | linear correction curve | R <sup>2</sup> | IC <sub>50</sub> (µg/mL) |
|--------|-------------------------|----------------|--------------------------|
| 1      | $y = -0.1919x + 1.1014$ | 0.9859         | 1.36                     |
| 2      | $y = -0.2032x + 0.9938$ | 0.9907         | 0.27                     |

5

6

7

8

9

10

11

12

13

14

15

A

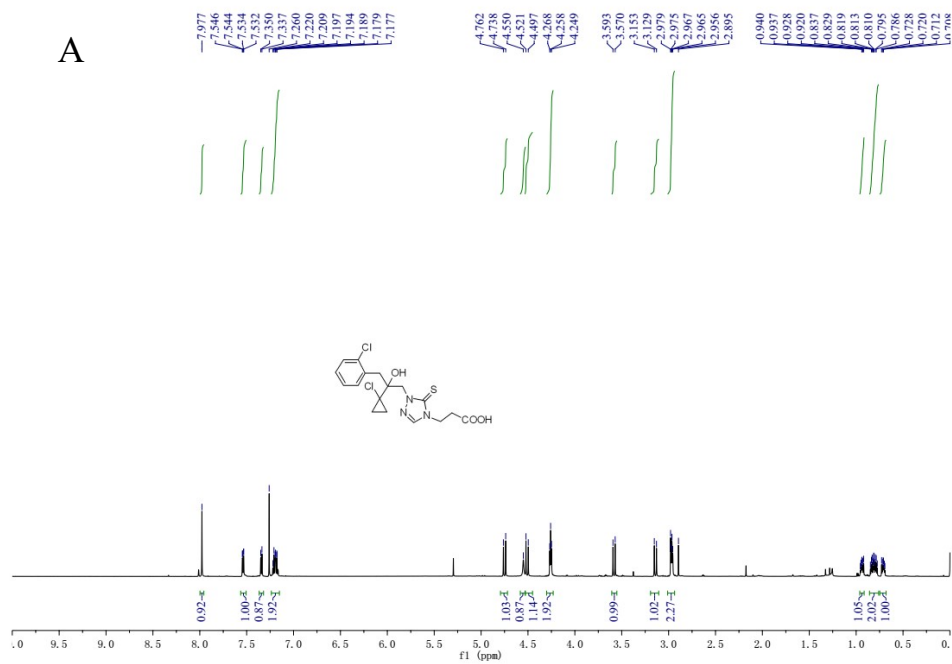

16

B

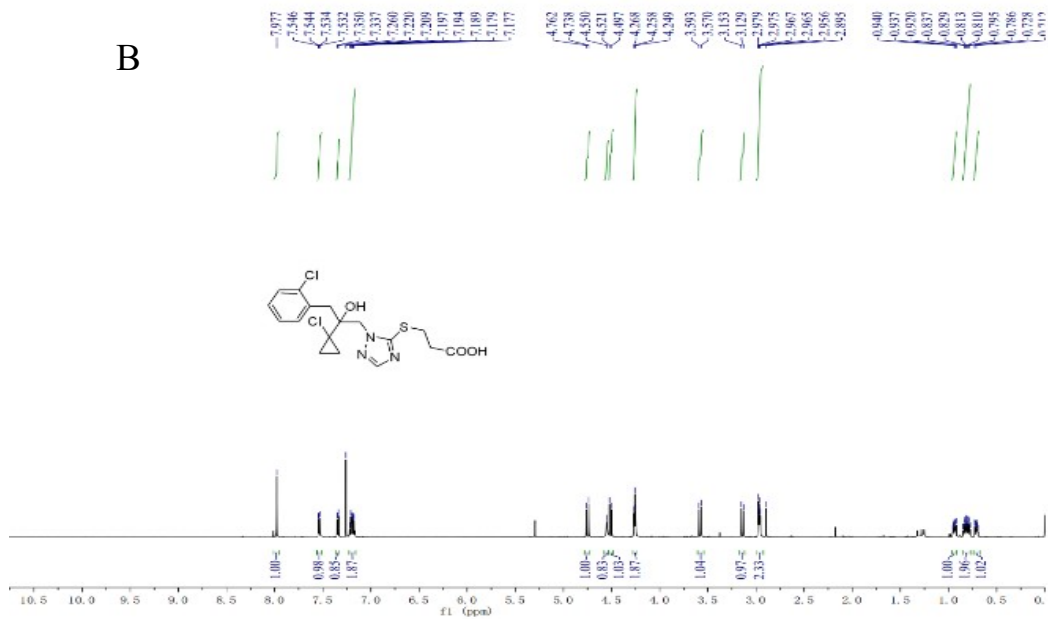

17

18

**Fig. S1** Reaction routes to the prothioconazole antigens. A is product 1; B is

19

product 2.

20

21

22

23

24

25

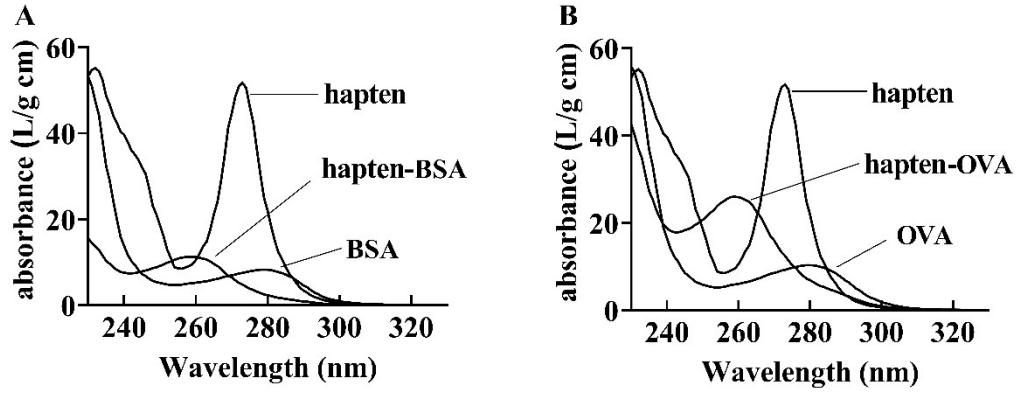

26

27 **Fig. S2** UV spectrum of the artificial antigens of prothioconazole. A is immune  
28 antigen; B is coated antigen.

29

30

31

32

33

34

35

36
